# Supplementary material for: Network Analysis of the Food-Energy-Water Nexus in the Gulf of Mexico (America) Region
Source: Research Square preprint supplement (doi:10.21203/rs.3.rs-7077115/v1), 2025-07-22
Supplement: Supplementary file 1 [file 61f51fcc0f34ed3aa0944108.xlsx]

## Sheet: TableS1
Analyzed Opensourse Resources
Table S1. Opensource media articles and literature analyzed across all themes( biosolids, dead zone, Permian Basin, and water markets).
Biosolids	Dead Zone	Permian Basin	Water Markets	Article
			x	Atlanta Regional Commission. Tri-State Water Wars Overview. 2023; Available from: https://atlantaregional.org/what-we-do/natural-resources/tri-state-water-wars-overview/.
	x			Baddour, D. Industry Threatens Water Supplies and Coastal Ecology Near Corpus Christi. 2022; Available from: https://www.texasobserver.org/corpus-christi-water-exxon-desalinization/.
		x	x	Baddour, D. Landowners Fear Injection of Fracking Waste Threatens Aquifers in West Texas. 2023; Available from: https://insideclimatenews.org/news/10032023/fracking-texas-produced-water/.
			x	Baurick, T. Louisiana may sell water to drought-stricken Texas. 2017 2019; Available from: https://www.nola.com/news/environment/louisiana-may-sell-water-to-drought-stricken-texas/article_f1538766-fd95-5314-b48d-2785d541dad1.html.
		x		Brock, H. The Produced Water Problem series: How the Permian Basin handles immense oilfield waste. 2024; Available from: https://www.firstalert7.com/2024/03/03/produced-water-problem-series-how-texas-handles-overwhelming-oilfield-wastewater/.
		x		Brock, H. Water in Energy: Seismicity, water shortages are catalysts for produced water progress. 2024; Available from: https://www.firstalert7.com/2024/03/08/water-energy-seismicity-water-shortages-are-catalysts-produced-water-progress/.
		x		Carr, H., Take Me to the Water - New JV's Focus Is Moving Permian Natural Gas to LNG Export Terminals. 2024, RBN Energy.
		x		Carver, J.L. Texas farmers are worried one of the state’s most precious water resources is running dry. You should be, too. 2023; Available from: https://www.texastribune.org/2023/06/20/texas-ogallala-aquifer-farming-climate-change/.
	x			Cooper, J. The price of plenty: Florida's hidden backbone. 2023; Available from: https://www.wlrn.org/environment/2023-06-30/florida-phosphate-industry-fertilizer-history.
x	x			Daprile, L. Experts: Florida should sell, export human waste, not dump it on farms. 2017; Available from: https://www.tcpalm.com/story/news/investigations/2017/04/26/biosolids-disposal-solutions/99744306/.
		x		Defenders of Wildlife. From Permian to Padre: Fossil Fuels Impact Wildlife Across Texas. 2020; Available from: https://defenders.org/blog/2020/06/permian-padre-fossil-fuels-impact-wildlife-across-texas.
		x		Dent, M. A New Pipeline Through the Hill Country Is Pitting the Oil Industry Against Landowners. 2019; Available from: https://www.texasmonthly.com/news-politics/permian-highway-pipeline-oil-industry-landowners/.
	x			Dryfoos, D. At the mouth of the Mississippi, Louisiana bears the burden of upstream runoff. Why doesn’t it push for solutions? 2024; Available from: https://thelensnola.org/2024/06/18/louisiana-bears-the-burden-of-upstream-runoff/.
	x			Environmental Protection Agency. Mosaic Fertilizer, LLC Settlement. 2015; Available from: https://www.epa.gov/enforcement/mosaic-fertilizer-llc-settlement.
		x		Gardner, T. Congress kills U.S. oil export ban, boosts solar, wind power. 2015; Available from: https://www.reuters.com/article/idUSKBN0U121U/.
		x	x	Goodyear, S. For Some in the Southwest, It’s Come to Selling Water to Fracking Companies. 2013; Available from: https://nextcity.org/urbanist-news/for-some-in-the-southwest-its-come-to-selling-water-to-fracking-companies.
		x		Hardy, K. and A. Kite. Agriculture built these High Plains towns. Now, it might run them dry. 2024; Available from: https://stateline.org/2024/01/29/agriculture-built-these-high-plains-towns-now-it-might-run-them-dry/.
x				Hayes, J. EWG: ‘Forever chemicals’ may taint nearly 20 million cropland acres. 2022; Available from: https://www.ewg.org/news-insights/news/2022/04/ewg-forever-chemicals-may-taint-nearly-20-million-cropland-acres.
		x		Henrikson, D. and E. Henrikson. Houston oil executive wants to build private dam for recreation on South Llano River. 2023; Available from: https://www.kxan.com/texas-water/houston-oil-executive-wants-to-build-private-dam-for-recreation-on-south-llano-river/?ipid=promo-link-block1.
x				Lopez, R. ‘This is Chernobyl’: Texas ranchers say ‘forever chemicals’ in waste-based fertilizers ruined their land. 2024; Available from: https://www.wfaa.com/article/news/investigations/texas-johnson-county-ranchers-forever-chemicals-pfas-fort-worth/287-85b7d4ce-c694-4c2a-b221-78bd94d6c8f6.
		x		Matalon, L. New Approach In Texas To Cutting Use Of Fresh Water In Fracking. 2017; Available from: https://www.texasstandard.org/stories/new-approach-in-texas-to-cutting-use-of-fresh-water-in-fracking/.
		x		Miller, J. In Corpus Christi, Texas, Environmentalists Are Fighting a Slate of Proposed Desalination Plants. 2023; Available from: https://www.sierraclub.org/sierra/2023-2-summer/feature/corpus-christi-texas-environmentalists-are-fighting-desalination.
	x			National Oceanic and Atmospheric Administration. Gulf Coast: Oyster Shell Recycling Key to Sustainable Seafood and Coastal Protection. 2024; Available from: https://www.fisheries.noaa.gov/feature-story/gulf-coast-oyster-shell-recycling-key-sustainable-seafood-and-coastal-protection.
	x			National Oceanic and Atmospheric Administration. Hitting Us Where it Hurts: The Untold Story of Harmful Algal Blooms. 2024; Available from: https://www.fisheries.noaa.gov/west-coast/science-data/hitting-us-where-it-hurts-untold-story-harmful-algal-blooms.
	x			Office of Public Affairs - Department of Justice. Mississippi Phosphates Corp. Pleads Guilty to Clean Water Act Violation and Agrees to Transfer 320 Acres to Grand Bay National Estuary. 2015.
x				Perkins, T. Biosolids: mix human waste with toxic chemicals, then spread on crops. 2019; Available from: https://www.theguardian.com/environment/2019/oct/05/biosolids-toxic-chemicals-pollution.
			x	Pskowski, M. Texas Eyes Marine Desalination, Oilfield Water Reuse to Sustain Rapid Growth. 2023; Available from: https://insideclimatenews.org/news/15042023/texas-water-legislation-desalination-oilfield-wastewatereyes-marine-desalination-oilfield-water/.
x				Public Employees for Environmental Responsibility. PFAS in Biosolids Fertilizer Sparks Damages Lawsuit. 2024.
		x	x	Reese, A. There’s a new boom in the Permian Basin — wastewater. 2020; Available from: https://www.hcn.org/articles/water-theres-a-new-boom-in-the-permian-basin-wastewater/.
			x	Root, J. New Mexico official says Texas landowners are “stealing” millions of gallons of water and selling it back for fracking. 2018; Available from: https://www.texastribune.org/2018/06/07/texas-landowners-new-mexico-stealing-water-fracking/.
			x	Sanchez, S. ‘Water bank’ sought to maintain flow to South Texas cities in drought. 2014; Available from: https://www.myarklamiss.com/news/water-bank-sought-to-maintain-flow-to-south-texas-cities-in-drought/.
			x	Schmidt, T. La. Sabine River Authority holding special meeting to discuss water sales to Texas. 2023; Available from: https://www.kplctv.com/2023/04/13/la-sabine-river-authority-holding-special-meeting-discuss-water-sales-texas/.
	x			Schneider, K. ‘It’s getting worse’ – U.S. failing to stem tide of harmful farm pollutants. 2024; Available from: https://lailluminator.com/2024/04/22/farm-pollutants/.
			x	Segarra, C. Texas v. New Mexico Rio Grande water settlement awaits Supreme Court. 2023; Available from: https://www.krqe.com/news/environment/texas-v-new-mexico-rio-grande-water-settlement-awaits-supreme-court/.
			x	Seidemann, R.M., Water and Power: The Sabine River Authority of Louisiana— A Review of Property Disputes, Hydropower, and Water Sales. Tulane Environmental Law Journal, 2012. 25(389): p. 389-418.
	x			Simmerman, A. and D. Rice. A 'dead zone' is growing in the Gulf of Mexico. It's now the size of New Jersey. 2024; Available from: https://www.statesman.com/story/news/state/2024/08/05/dead-zone-gulf-of-mexico-2024-noaa-texas-louisiana-marine-life-pollution-climate-change-ocean/74649935007/.
		x		Skinner, J. What Lies Beneath: Long-Forgotten Wells, Brine Water, and the Health of West Texas Aquifers. 2022; Available from: https://www.firstalert7.com/2022/01/21/what-lies-beneath-long-forgotten-wells-brine-water-health-west-texas-aquifers/.
		x		Sustainable Agriculture Research and Education (SARE). The Ogallala Aquifer of the Texas High Plains: A Race Against Time. 2012; Available from: https://www.sare.org/resources/the-ogallala-aquifer-of-the-texas-high-plains-a-race-against-time/.
		x		Texas Produced Water Consortium. Beneficial Use of Produced Water in Texas: Challenges, Opportunities and the Path Forward. 2022, Texas Legislature. p. 130.
	x			Tritto, E. The price of plenty: Fixed on nitrogen. 2023; Available from: https://www.wusf.org/environment/2023-06-05/the-price-of-plenty-fixed-on-nitrogen.
			x	White, A. Amid Drought, Water Wars Pick Up on Borders. 2013; Available from: https://www.texastribune.org/2013/01/16/drought-water-wars-pick-borders/#:~:text=As%20Texas'%20drought%20wears%20into,a%20vast%20amount%20of%20water.
		x		Wright, K. We Need to Talk about Beneficial Reuse. 2022; Available from: https://www.b3insight.com/we-need-to-talk-about-beneficial-reuse/.
